# Supplementary material for: Effects of Mo/W codoping on the visible-light photocatalytic activity of monoclinic BiVO4 within the GGA + U framework
Source: Royal Society of Chemistry journal article supplement (doi:10.1039/c5ra22659g), 2016-01-01
Supplement: c5ra22659g1.pdf [file c5ra22659g1.pdf]

## Supporting Information

# Effects of Mo/W codoping on the visible-light photocatalytic activity of monoclinic BiVO<sub>4</sub> within the GGA+ U framework

Jihua Zhang,<sup>a,b</sup> Mingsen Deng, \*,<sup>a,c</sup> Fengzhu Ren<sup>b</sup>, Yu Wu<sup>a</sup>,

Yuanxu Wang, \*,<sup>a,b</sup>

<sup>a</sup>Guizhou Provincial Key Laboratory of Computational Nano-Material Science,  
Guizhou Education University, 115 Gaoxin Road, Guiyang, 550018, China.

<sup>b</sup>Institute for Computational Materials Science, School of Physics and Electronics,  
Henan University, Kaifeng 475004, China.

<sup>c</sup>Guizhou Synergetic Innovation Center of Scientific Big Data for Advanced  
Manufacturing Technology, Guizhou Education University, Guiyang, 550018, China.

Email: [deng@gznc.edu.cn](mailto:deng@gznc.edu.cn), Phone: +86-851-86276007; [wangyx@henu.edu.cn](mailto:wangyx@henu.edu.cn), +86-

371- 23888990

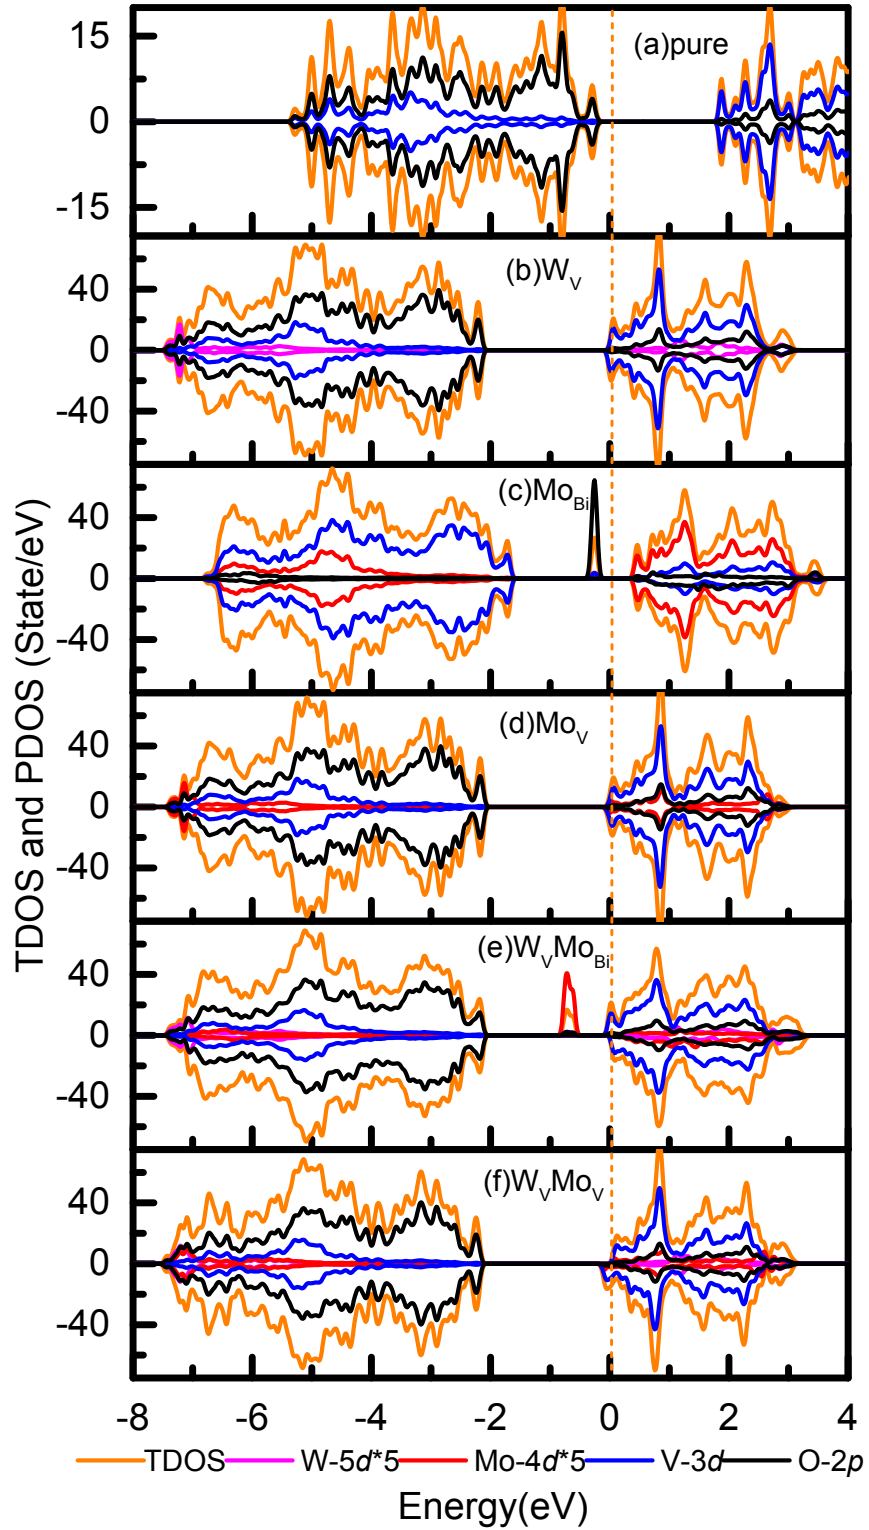

Fig. S1 DOS of pure, Mo,W mono-doped and Mo/W cod-oped  $\text{BiVO}_4$ : (a)pure, (b) $\text{W}_V$ , (c) $\text{Mo}_{\text{Bi}}$ , (d) $\text{Mo}_V$ , (e)  $\text{W}_V\text{Mo}_{\text{Bi}}$  (f)  $\text{W}_V\text{Mo}_V$ , from DFT calculations. The dashed lines stand for the Fermi level (at 0eV). The orange lines represent the total DOS (TDOS) black for O 2p, blue for V 3d, red for the quadruplicate of Mo 4d and magenta for the quadruplicate of W 5d, respectively. The Mo 4d and W 5d states are multiplied by 4 times to show their distribution clearly. The dashed lines stand for the Fermi level (at 0eV).

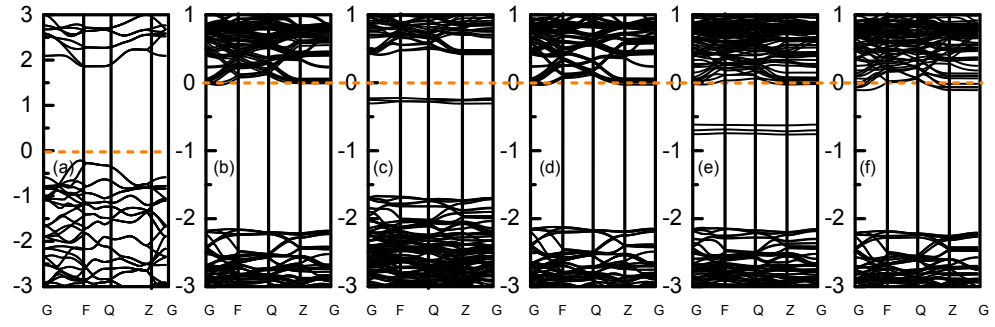

Fig. S2 Band structures of pure, Mo, W mono-doped and Mo/W co-doped  $\text{BiVO}_4$ : (a) pure, (b)  $\text{W}_\text{V}$ , (c)  $\text{Mo}_{\text{Bi}}$ , (d)  $\text{Mo}_\text{V}$ , (e)  $\text{W}_\text{V}\text{Mo}_{\text{Bi}}$  (f)  $\text{W}_\text{V}\text{Mo}_\text{V}$ , from DFT(GGA) calculations. The dashed lines stand for the Fermi level (at 0 eV).

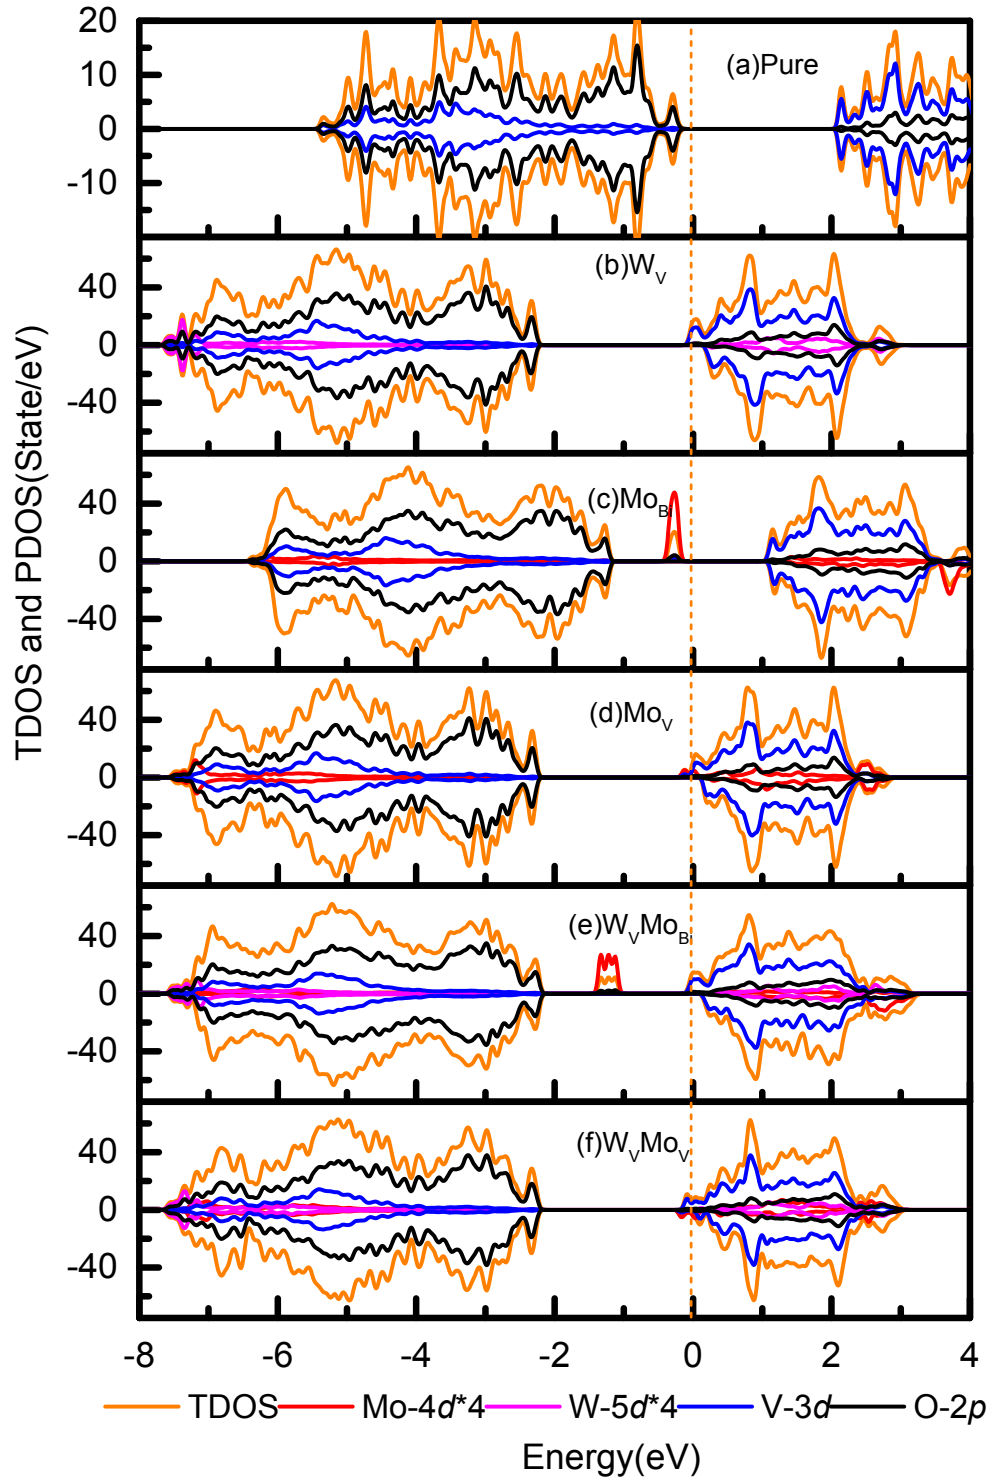

Fig. S3 DOS of pure, Mo,W mono-doped and Mo/W co-doped  $\text{BiVO}_4$ : (a)pure, (b) $\text{W}_V$ , (c) $\text{Mo}_{Bi}$ , (d) $\text{Mo}_V$ , (e)  $\text{W}_V\text{Mo}_{Bi}$  (f)  $\text{W}_V\text{Mo}_V$ , from DFT(GGA)+U calculations. The orange lines represent the total DOS (TDOS) black for O 2p, blue for V 3d, red for the quadruplicate of Mo 4d and magenta for the quadruplicate of W 5d, respectively. The Mo 4d and W 5d states are multiplied by 4 times to show their distribution clearly. The dashed lines stand for the Fermi level (at 0eV).

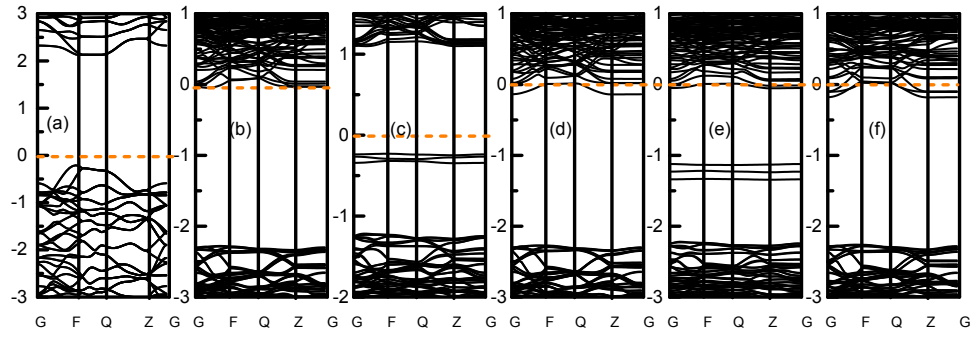

Fig. S4 Band structures of pure, Mo, W mono-doped and Mo/W co-doped  $\text{BiVO}_4$ : (a) pure, (b)  $\text{W}_\text{V}$ , (c)  $\text{Mo}_\text{Bi}$ , (d)  $\text{Mo}_\text{V}$ , (e)  $\text{W}_\text{V}\text{Mo}_\text{Bi}$  (f)  $\text{W}_\text{V}\text{Mo}_\text{V}$ , from DFT(GGA)+U calculations. The dashed lines stand for the Fermi level (at 0eV).

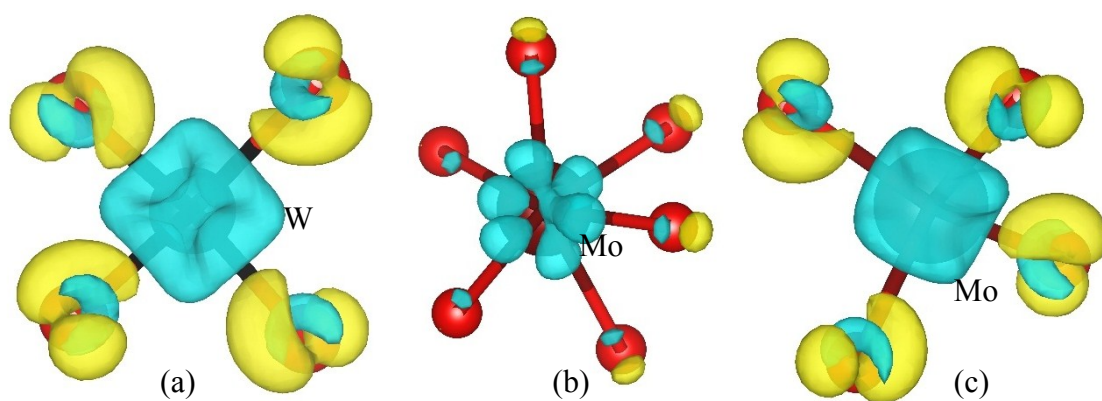

Fig S5 (Color online) Charge density difference isosurfaces of (a) $\text{W}_\text{V}$  (b)  $\text{Mo}_\text{Bi}$  and (c) $\text{Mo}_\text{V}$  monodoped  $\text{BiVO}_4$ . The cyan region represents charge depletion and the yellow region represents charge accumulation. The isosurface value is  $0.03 \text{ e}/\text{\AA}^3$ . The light red, purple and black spheres represent O, Mo and W atoms, respectively.
